# Supplementary material for: Mice Lacking Platelet-Derived Growth Factor D Display a Mild Vascular Phenotype
Source: PubMed Central journal article supplement (PMC4816573; doi:10.1371/journal.pone.0152276), 2016-03-31
Supplement: pone.0152276.s008.pdf [file pone.0152276.s008.pdf]

## Supportive Table 1. Primer sequences

| <b>Gene (PCR genotyping)</b>           | <b>Forward 5' - 3'</b> | <b>Reverse 5' - 3'</b> |
|----------------------------------------|------------------------|------------------------|
| Pdgfd wildtype exon1 (PCR genotyping)  | GAATCCACGTCAACCTGTTG   | CGCACAGGAGAATGGAGACT   |
| Pdgfd knockout allele (PCR genotyping) | GAATCCACGTCAACCTGTTG   | GTCTGTCCTAGCTTCCTCACTG |

  

| <b>Gene (qPCR)</b> | <b>Forward 5' - 3'</b> | <b>Reverse 5' - 3'</b> |
|--------------------|------------------------|------------------------|
| Pdgfd exon 1       | GACTCAACCCTTTGGGCTTT   | AGCTTTGATGGATGCTCTCTG  |
| Cspg4              | GGCTCTTACCTTGGCCTTGT   | GGGATGTGGAGAACTGGAGC   |
| Des                | GATGGCCTTGGATGTGGAGA   | TCAGAACCCCTTTGCTCGG    |
| Gata4              | TTCTGGGAAACTGGAGCTGG   | TTTCTGCCTGCTACACACCC   |
| Notch1             | TTGAGATGCTCCCAGCCAAG   | GCTGAGGCAAGGATTGGAGT   |
| Pdgfd              | CTTCTGACATGGTGGCTCCG   | CTTGGAGGGATCTCCTTGTGG  |
| L19                | GGTGACCTGGATGAGAAGGA   | TTCAGCTTGTGGATGTGCTC   |

  

| <b>Gene (Qiagen prevalidated, qPCR)</b> | <b>Qiagen primer name</b> | <b>Catalogue number</b> |
|-----------------------------------------|---------------------------|-------------------------|
| Pecam1                                  | Mm_Pecam1_1_SG            | QT01052044 (Qiagen)     |
| L19                                     | Mm_Rpl19_2_SG             | QT01779218 (Qiagen)     |
