# Supplementary material for: Mice Lacking Platelet-Derived Growth Factor D Display a Mild Vascular Phenotype
Source: PubMed Central journal article supplement (PMC4816573; doi:10.1371/journal.pone.0152276), 2016-03-31
Supplement: pone.0152276.s009.pdf [file pone.0152276.s009.pdf]

**Supportive Table 2. Primary antibodies**

| Antigen                       | Product identity                                      | Host species | Manufacturer    | Dilution |
|-------------------------------|-------------------------------------------------------|--------------|-----------------|----------|
| PECAM <sup>1</sup><br>(mouse) | CD31 AF3628                                           | goat         | R&D Systems     | 1:500    |
| PECAM <sup>2</sup><br>(mouse) | Platelet Endothelial Cell Adhesion Molecule-1 MEC13.3 | rat          | BD Pharmingen   | 1:500    |
| Podocalyxin<br>(mouse)        | Podocalyxin AF1556                                    | goat         | R&D Systems     | 1:200    |
| aSMA                          | Actin, a-Smooth Muscle-Cy3 clone 1A4, C6198           | mouse        | Sigma-Aldrich   | 1:2000   |
| PDGFR $\beta$<br>(human)      | PDGFR $\beta$ (28E1) #3169                            | rabbit       | Cell signaling  | 1:50     |
| NG2 (rat)                     | NG2 Chondroitin Sulfate Proteoglycan AB5320           | rabbit       | Millipore       | 1:200    |
| Insulin<br>(human)            | Insulin MAB1417                                       | rat          | R&D Systems     | 1:600    |
| Glucagon                      | Glucagon AB932                                        | rabbit       | Millipore       | 1:500    |
| PDGF-D<br>(human)             | Anti-PDGF-D 626                                       | rabbit       | (in-house-made) | 1:500    |

<sup>1</sup>Used for Fig. 5, S3, S4

<sup>2</sup>Used for Fig. S6
