# Supplementary material for: Mice Lacking Platelet-Derived Growth Factor D Display a Mild Vascular Phenotype
Source: PubMed Central journal article supplement (PMC4816573; doi:10.1371/journal.pone.0152276), 2016-03-31
Supplement: pone.0152276.s010.pdf [file pone.0152276.s010.pdf]

**Supportive Table 3. Genotype distribution from heterozygous crossings of *Pdgfd*<sup>+/-</sup> mice**

*Pdgfd*<sup>+/-</sup> x *Pdgfd*<sup>+/-</sup>

| <b>+/+</b> | <b>+/-</b> | <b>-/-</b> | <b>Chi-square</b> |
|------------|------------|------------|-------------------|
| 93 (27%)   | 179 (51%)  | 78 (22%)   | 0.48              |

Number of animals per genotype (percentage of total)  
n=350
